# Supplementary material for: Novel imaging techniques to study postmortem human fetal anatomy: a systematic review on microfocus-CT and ultra-high-field MRI
Source: PubMed Central journal article supplement (PMC7062658; doi:10.1007/s00330-019-06543-8), 2019-12-13
Supplement: 330_2019_6543_MOESM3_ESM.pdf [file 330_2019_6543_MOESM3_ESM.pdf]

Identification

Records identified through  
EMBASE  
(n = 1383)

Records identified through  
MEDLINE  
(n = 974)

Screening

Records screened after  
duplicates removed  
(n = 1831)

Records excluded  
(n = 1599)

Eligibility

Full-text articles assessed for  
eligibility (n = 232)

Full-text articles excluded,  
with reasons (n = 193)

- <7 T MRI (n = 110)
- Conventional CT (n = 10)
- Conference abstract (n = 23)
- Review (n = 18)
- Full text not available (n = 9)
- Overlapping data (n = 23)

Included

Studies included in systematic  
review  
(n = 39)

Additional articles retrieved  
by reference checking  
(n = 0)
